# Supplementary material for: Phylogeny and divergence of the pinnipeds (Carnivora: Mammalia) assessed using a multigene dataset
Source: BMC Evol Biol. 2007 Nov 9;7:216. doi: 10.1186/1471-2148-7-216 (PMC2245807; doi:10.1186/1471-2148-7-216)
Supplement: Additional file 1 — GenBank accession numbers. GenBank accession numbers for all pinniped, canid and ursid sequences used in this study. [file 1471-2148-7-216-S1.xls]

## Sheet: Higdon et al. GenBank data
Species	aldolase_a	aldolase_c	apob26	apob29	apob_editing	cyp1a1	cyp1a2	histone_h2af	hla_doa	lyz	mhc_class_ii_dqa_1	mhc_class_ii_dqa_2	mhc_dqb	mtatp6	mtatp8	mtco1	mtco2	mtco3	mtcyb	mtnd1	mtnd2	mtnd3	mtnd4	mtnd4l	mtnd5	mtnd6	mtrnr1	mtrnr2	mx	ob	rag1	rod_opsin	sry	tbg	trna_ala	trna_arg	trna_asn	trna_asp	trna_cys	trna_gln	trna_glu	trna_gly	trna_his	trna_ile	trna_lys	trna_met	trna_phe	trna_pro	trna_thr
Arctocephalus_australis														AY377312	AY377196	AY377150	AY377173	AY377265	AY377329	AY377363	AY377283	AY377219	AY377345	AY377242	AY377381								AY429653								AY712956
Arctocephalus_forsteri	U03566	U03577						U03597				U03580	AF111045	AF513820	AF513820	AF513820	AF513820	AF513820	X82293	AF513820	AF513820	AF513820	AF513820	AF513820	AF513820	AF513820	Y08527	AF513820					AY429652		AF513820	AF513820	NC_004023	NC_004023	AF513820	AF513820	AF513820	AF513820	AF513820	AF513820	AF513820	AF513820	AF513820		AF513820
Arctocephalus_galapagoensis																			AF380900
Arctocephalus_gazella													AF111039						X82292								Y08526						AY424651
Arctocephalus_philippii																			AF380893
Arctocephalus_pusillus																			U18448
Arctocephalus_townsendi																			AF380896
Arctocephalus_tropicalis																			U18456
Callorhinus_ursinus			AB193422																AY424647		AY882068						U12830						AY424652	AY750663
Canis_latrans																												U78329
Canis_lupus	U03565	U03570			AJ399501		NM_001008720	U03585			NM_001011726	NM_001011726	AF016909	AY729880	AY729880	AY729880	AF028213	AY729880	AY170103	AB048590	AY170044	U96639	U96639	U96639	U96639	U96639	AY729880		NM_001003134	AB020986	XM_540538	NM_001008276	AF107021	AY750653	U96639	AY729880	U96639	U96639	U96639	U96639	AB048590	U96639	U96639	AB048590	U96639	U96639	AB048590	U96639	AB048590
Cystophora_cristata														AY377306	AY377190	AY377144	AY377167	AY377259	X82294	AY377357	AY377277	AY377213	AY377339	AY377236	AY377375								AY424658
Erignathus_barbatus														AY377305	AY377189	AY377143	AY377166	AY377258	AY170104	AY377356	AY377276	AY377212	AY377338	AY377235	AY377374								AY424665	AY750665
Eumetopias_jubatus			AB193423			AB014356	AB014357							AJ428578	AJ428578	AJ428578	AJ428578	AJ428578	DQ145021	AJ428578	AJ428578	AJ428578	AJ428578	AJ428578	AJ428578	AJ428578	NC_004030	AJ428578	AB222179				AY424649		AJ428578	AJ428578	AJ428578	AJ428578	AJ428578	AJ428578	AJ428578	AJ428578	AJ428578	AJ428578	AJ428578	AJ428578	AJ428578	AJ428578	AJ428578
Halichoerus_grypus						AJ621378	AJ621379			AJ831408				X72004	X72004	X72004	X72004	X72004	NC_001602	X72004	X72004	X72004	X72004	X72004	X72004	X72004	X72004	X72004		AJ618982			AY424660		X72004	X72004	X72004	X72004	X72004	X72004	X72004	X72004	X72004	X72004	X72004	X72004	X72004	X72004	X72004
Hydrurga_leptonyx	U03568	U03573						U03598	AY752950		AY283566	U03584		AY377296	AY377181	AY377135	AY377157	AY377250	AY377323	AY377350	AY377270	AY377204	AY377332	AY377226	AY377368	AY377317	AY377288	AY377386					AY424655
Leptonychotes_weddellii	U03569	U03592						U03587	AY752949	AJ831413	AY283565	U03594		AY377299	AY377183	AY377137	AY377159	AY377251	AY377324	AY377351	AY377271	AY377205	AY377333	AY377229	AY377369	AY377318	AY377289	AY377387		AM157373
Lobodon_carcinophagus											AY283568			AY377293	AY377177	AY377130	AY377154	AY377246	AY377321	AY377348	AY377268	AY377199	AY377330	AY377222	AY377366	AY377315	AY377286	AY377384
Mirounga_angustirostris	U03572	U03574		DQ240354	AJ399499			U03586	AY752947			U03582	AF111031	AY377301	AY377184	AY377138	AY377161	AY377253	AY377325	AY377352	AY377272	AY377208	AY377334	AY377230	AY377370	AY377319	AY377290	AY377388			DQ240719	AY228452	AY424656
Mirounga_leonina	L17497	L17498						L17501	AY752948		U91907	U91907	AF111036	AY377302	AY377186	AY377140	AY377163	AY377255	AY377326	AY377353	AY377273	AY377209	AY377335	AY377232	AY377371	AY377320	Y08523	AY377389					AY424657
Monachus_monachus														AY377304	AY377188	AY377142	AY377165	AY377257	AY377327	AY377355	AY377275	AY377211	AY377337	AY377234	AY377373
Monachus_schauinslandi											AF093799			AY377303	AY377187	AY377141	AY377164	AY377256	X72209	AY377354	AY377274	AY377210	AY377336	AY377233	AY377372		Y08524						AY424654															U59753	U59753
Neophoca_cinerea																			AF380912
Odobenus_rosmarus				DQ240355										AY377310	AY377194	AY377148	AY377171	AY377263	X82299	AY377361	AY377281	AY377217	AY377343	AJ428576	AY377379	AJ428576	AJ428576	AJ428576			DQ240720		AY424653	AY750662	AJ428576	NC_004029	AJ428576	AJ428576	AJ428576	NC_004029	AJ428576	AJ428576	NC_004029	AJ428576	AJ428576	AJ428576	AJ428576	AJ428576	AJ428576
Ommatophoca_rossii									AY131996		AY283567			AY377295	AY377178	AY377132	AY377155	AY377247	AY377322	AY377349	AY377269	AY377201	AY377331	AY377224	AY377367	AY377316	AY377287	AY377385
Otaria_byronia														AY377311	AY377195	AY377149	AY377172	AY377264	AY377328	AY377362	AY377282	AY377218	AY377344	AY377241	AY377380				AB222180												AY713005
Phoca_caspica																AY140964	AY140971		AY140978														AY424661
Phoca_fasciata						AB030451	AB030452									AY140966	AY140973		X82302
Phoca_groenlandica						AJ621380	AJ621381							AY377307	AY377191	AY377145	AY377168	AY377260	X82303	AY377358	AY377278	AY377214	AY377340	AY377237	AY377376							AF055318	AY424659
Phoca_hispida														AY377308	AY377192	AY377146	AY377169	AY377261	X82304	AY377359	AY377279	AY377215	AY377341	AY377238	AY377377								AY424663
Phoca_largha			AB193424			AB014358								AY377309	AY377193	AY377147	AY377170	AY377262	X82305	AY377360	AY377280	AY377216	AY377342	AB244723	AY377378								AY424664			AB244728												DQ153240	DQ153240
Phoca_sibirica																AY140963	AY140970		AY140977
Phoca_vitulina	U03567	U03571	AB193425		AJ399500			U03596		AJ831412		U03581		X63726	X63726	X63726	X63726	X63726	X82306	X63726	X63726	X63726		X63726	X63726	X63726	X63726	X63726	AB222181	AJ618981	AY239187	AF055317	AY424662	AY750666	X63726	X63726	X63726	X63726	X63726	X63726	X63726	X63726	X63726	X63726	X63726	X63726	X63726	AF522763	X63726
Phocarctos_hookeri																			U12851								U12850
Ursus_americanus																														AY142109	DQ240717
Ursus_arctos			AB193429		AJ399496									AF303110	AF303110	AF303110	AF303110	AF303110	U18877	AF303110	AF303110	AF303110	AF303110	AF303110	AF303110	AF303110	Y08519						AY424666	AY750671	AF303110	AF303110	AF303110	AF303110	AF303110	AF303110	AF303110	AF303110	AF303110	AF303110	AF303110	AF303110	AF303110	AY331262	AY331262
Ursus_maritimus																												AJ428577				AY883926
Zalophus_californianus			AF548424		AJ399498														X82310		AY750639						Y08525	U78350					AY424650	AY750664
[truncated: 3 more columns]
